# Supplementary material for: Polymer micro-particles formed by thiol–ene suspension polymerization using canola oil as a diluent solvent
Source: Royal Society of Chemistry journal article supplement (doi:10.1039/d0ma00991a), 2021-01-01
Supplement: d0ma00991a1.pdf [file d0ma00991a1.pdf]

### Supplementary Information

| <b>2-thiol:4-thiol mol ratio 0.1:0.9</b> |                          |            |              |              |              |            |
|------------------------------------------|--------------------------|------------|--------------|--------------|--------------|------------|
| #                                        | 2-Ene:Hitenol mole ratio | 2-ene (μL) | 2-thiol (μL) | 4-thiol (μL) | Hitenol (mL) | Water (mL) |
| 1                                        | 1.0:0.0                  | 89.0       | 6.4          | 272.5        | 0.0          | 10.0       |
| 2                                        | 0.9:0.1                  | 78.5       | 6.4          | 272.5        | 0.4          | 9.6        |
| 3                                        | 0.8:0.2                  | 68.0       | 6.4          | 272.5        | 0.8          | 9.2        |
| 4                                        | 0.7:0.3                  | 57.5       | 6.4          | 272.5        | 1.2          | 8.8        |
| 5                                        | 0.6:0.4                  | 47.1       | 6.4          | 272.5        | 1.6          | 8.4        |
| 6                                        | 0.5:0.5                  | 36.6       | 6.4          | 272.5        | 2.0          | 8.0        |
| <b>2-thiol:4-thiol mol ratio 0.2:0.8</b> |                          |            |              |              |              |            |
| #                                        | 2-Ene:Hitenol mole ratio | 2-ene (μL) | 2-thiol (μL) | 4-thiol (μL) | Hitenol (mL) | Water (mL) |
| 1                                        | 1.0:0.0                  | 89.0       | 12.8         | 242.2        | 0            | 10         |
| 2                                        | 0.9:0.1                  | 78.5       | 12.8         | 242.2        | 0.4          | 9.6        |
| 3                                        | 0.8:0.2                  | 68.0       | 12.8         | 242.2        | 0.8          | 9.2        |
| 4                                        | 0.7:0.3                  | 57.5       | 12.8         | 242.2        | 1.2          | 8.8        |
| 5                                        | 0.6:0.4                  | 47.1       | 12.8         | 242.2        | 1.6          | 8.4        |
| 6                                        | 0.5:0.5                  | 36.6       | 12.8         | 242.2        | 2            | 8          |
| <b>2-thiol:4-thiol mol ratio 0.3:0.7</b> |                          |            |              |              |              |            |
| #                                        | 2-Ene:Hitenol mole ratio | 2-ene (μL) | 2-thiol (μL) | 4-thiol (μL) | Hitenol (mL) | Water (mL) |
| 1                                        | 1.0:0.0                  | 89.0       | 19.2         | 212.0        | 0            | 10         |
| 2                                        | 0.9:0.1                  | 78.5       | 19.2         | 212.0        | 0.4          | 9.6        |
| 3                                        | 0.8:0.2                  | 68.0       | 19.2         | 212.0        | 0.8          | 9.2        |
| 4                                        | 0.7:0.3                  | 57.5       | 19.2         | 212.0        | 1.2          | 8.8        |
| 5                                        | 0.6:0.4                  | 47.1       | 19.2         | 212.0        | 1.6          | 8.4        |
| 6                                        | 0.5:0.5                  | 36.6       | 19.2         | 212.0        | 2            | 8          |
| <b>2-thiol:4-thiol mol ratio 0.4:0.6</b> |                          |            |              |              |              |            |
| #                                        | 2-Ene:Hitenol mole ratio | 2-ene (μL) | 2-thiol (μL) | 4-thiol (μL) | Hitenol (mL) | Water (mL) |
| 1                                        | 1.0:0.0                  | 89.0       | 25.6         | 181.7        | 0            | 10         |
| 2                                        | 0.9:0.1                  | 78.5       | 25.6         | 181.7        | 0.4          | 9.6        |
| 3                                        | 0.8:0.2                  | 68.0       | 25.6         | 181.7        | 0.8          | 9.2        |
| 4                                        | 0.7:0.3                  | 57.5       | 25.6         | 181.7        | 1.2          | 8.8        |
| 5                                        | 0.6:0.4                  | 47.1       | 25.6         | 181.7        | 1.6          | 8.4        |
| 6                                        | 0.5:0.5                  | 36.6       | 25.6         | 181.7        | 2            | 8          |
| <b>2-thiol:4-thiol mol ratio 0.5:0.5</b> |                          |            |              |              |              |            |
| #                                        | 2-Ene:Hitenol mole ratio | 2-ene (μL) | 2-thiol (μL) | 4-thiol (μL) | Hitenol (mL) | Water (mL) |
| 1                                        | 1.0:0.0                  | 89.0       | 32.1         | 151.4        | 0            | 10         |
| 2                                        | 0.9:0.1                  | 78.5       | 32.1         | 151.4        | 0.4          | 9.6        |
| 3                                        | 0.8:0.2                  | 68.0       | 32.1         | 151.4        | 0.8          | 9.2        |
| 4                                        | 0.7:0.3                  | 57.5       | 32.1         | 151.4        | 1.2          | 8.8        |
| 5                                        | 0.6:0.4                  | 47.1       | 32.1         | 151.4        | 1.6          | 8.4        |
| 6                                        | 0.5:0.5                  | 36.6       | 32.1         | 151.4        | 2            | 8          |

**Supplementary Figure S1.** The thirty formulations tested for this project. 2-thiol to 4-thiol and 2-ene to Hitenol KH functional group molar ratios were altered to test the effect of crosslinking and surfactant concentration.

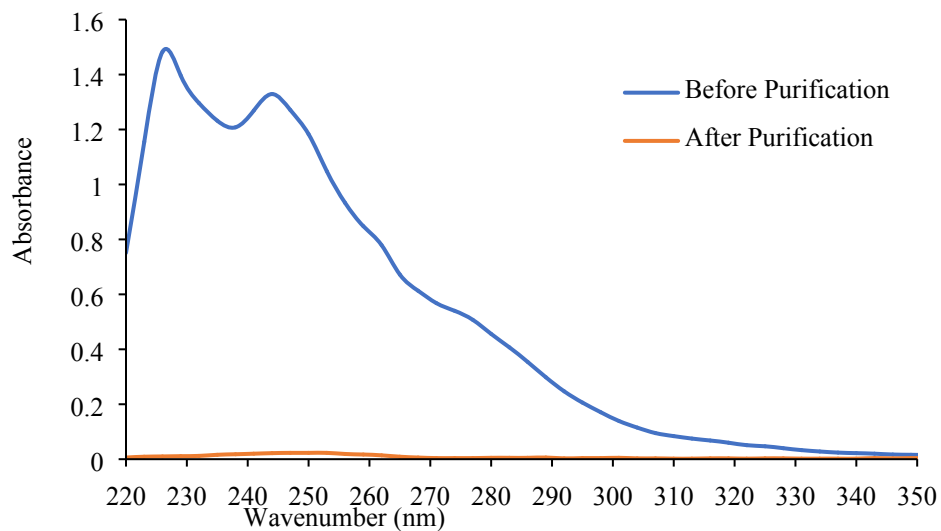

**Supplementary Figure S2.** The UV-Vis spectrum of PBS after three centrifugation cycles, soaking in DI water for 24 hours, and one final centrifugation cycle.

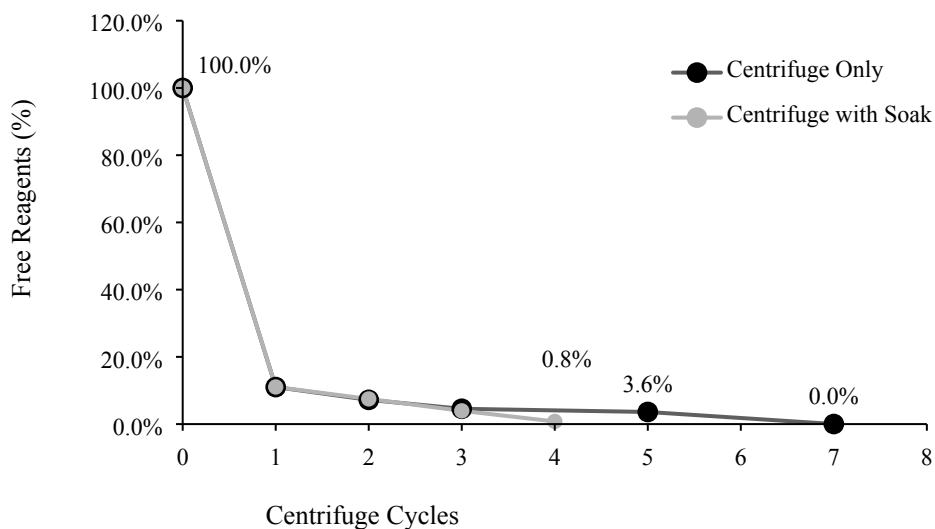

**Supplementary Figure S3.** Nanodrop peak-height measurements at 275 nm. Nanodrop peak-height measurements at 275 nm demonstrating the decreasing amounts of unreacted reagents with an increase in centrifugation cycles. (a) first purification method that used 7 centrifuge cycles to achieve greater than 99 % purity; (b) second purification method that used three centrifuges, a 24-hour soak in DI water, and one final centrifuge cycle.

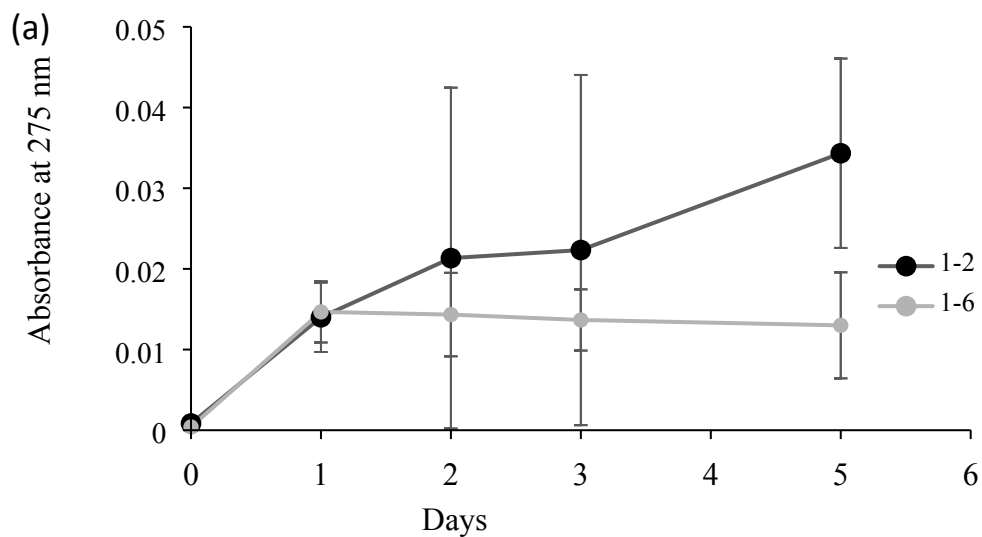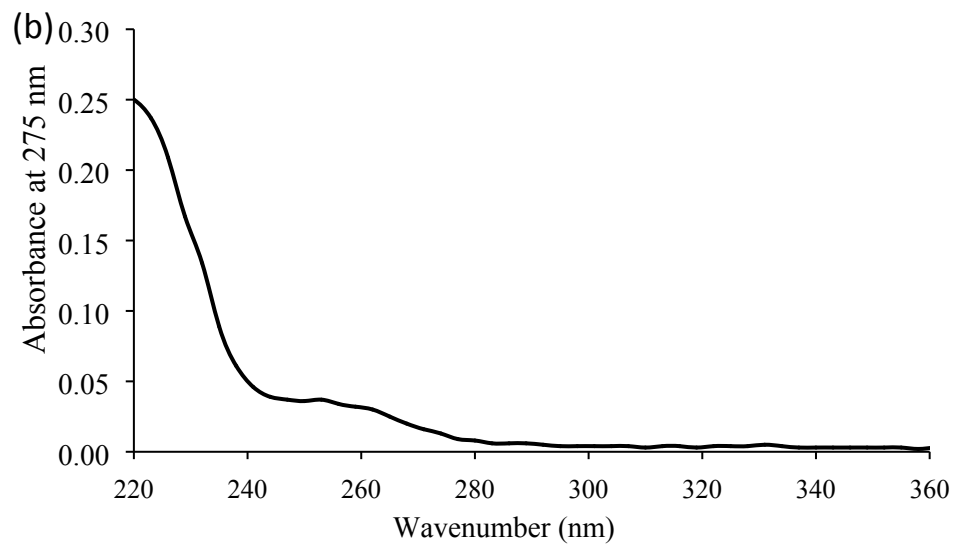

**Supplementary Figure S4.** UV-Vis measurements showing butyl acetate (a) Peak height at 275 nm for UV-Vis demonstrating the low absorbance values for the butyl acetate control particles that have no statistical change from day 1 to day 5 ( $p \leq 0.05$ ). (b) The UV spectrum is identical to that of butyl acetate.

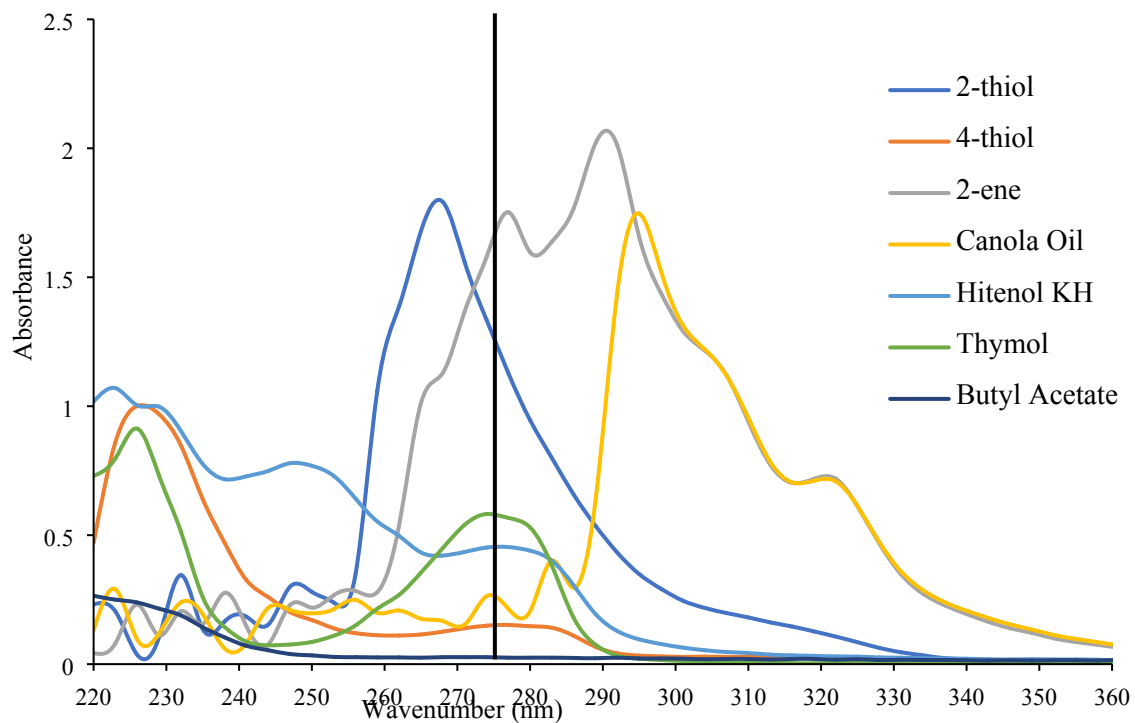

**Supplementary Figure S5.** UV-Vis of all monomers. Nanodrop UV-Vis spectra of all monomers, surfactant, and solvents used. The UV spectra for all components overlap at 275 nm.
